# Supplementary material for: Cyanobacterial contribution to the genomes of the plastid-lacking protists
Source: PubMed Central journal article supplement (PMC3087521; doi:10.1186/1471-2148-9-197), 2009-08-11
Supplement: 1471-2148-9-197-S5.pdf [file 1471-2148-9-197-S5.pdf]

A Bayesian tree

BI/ML

0.2

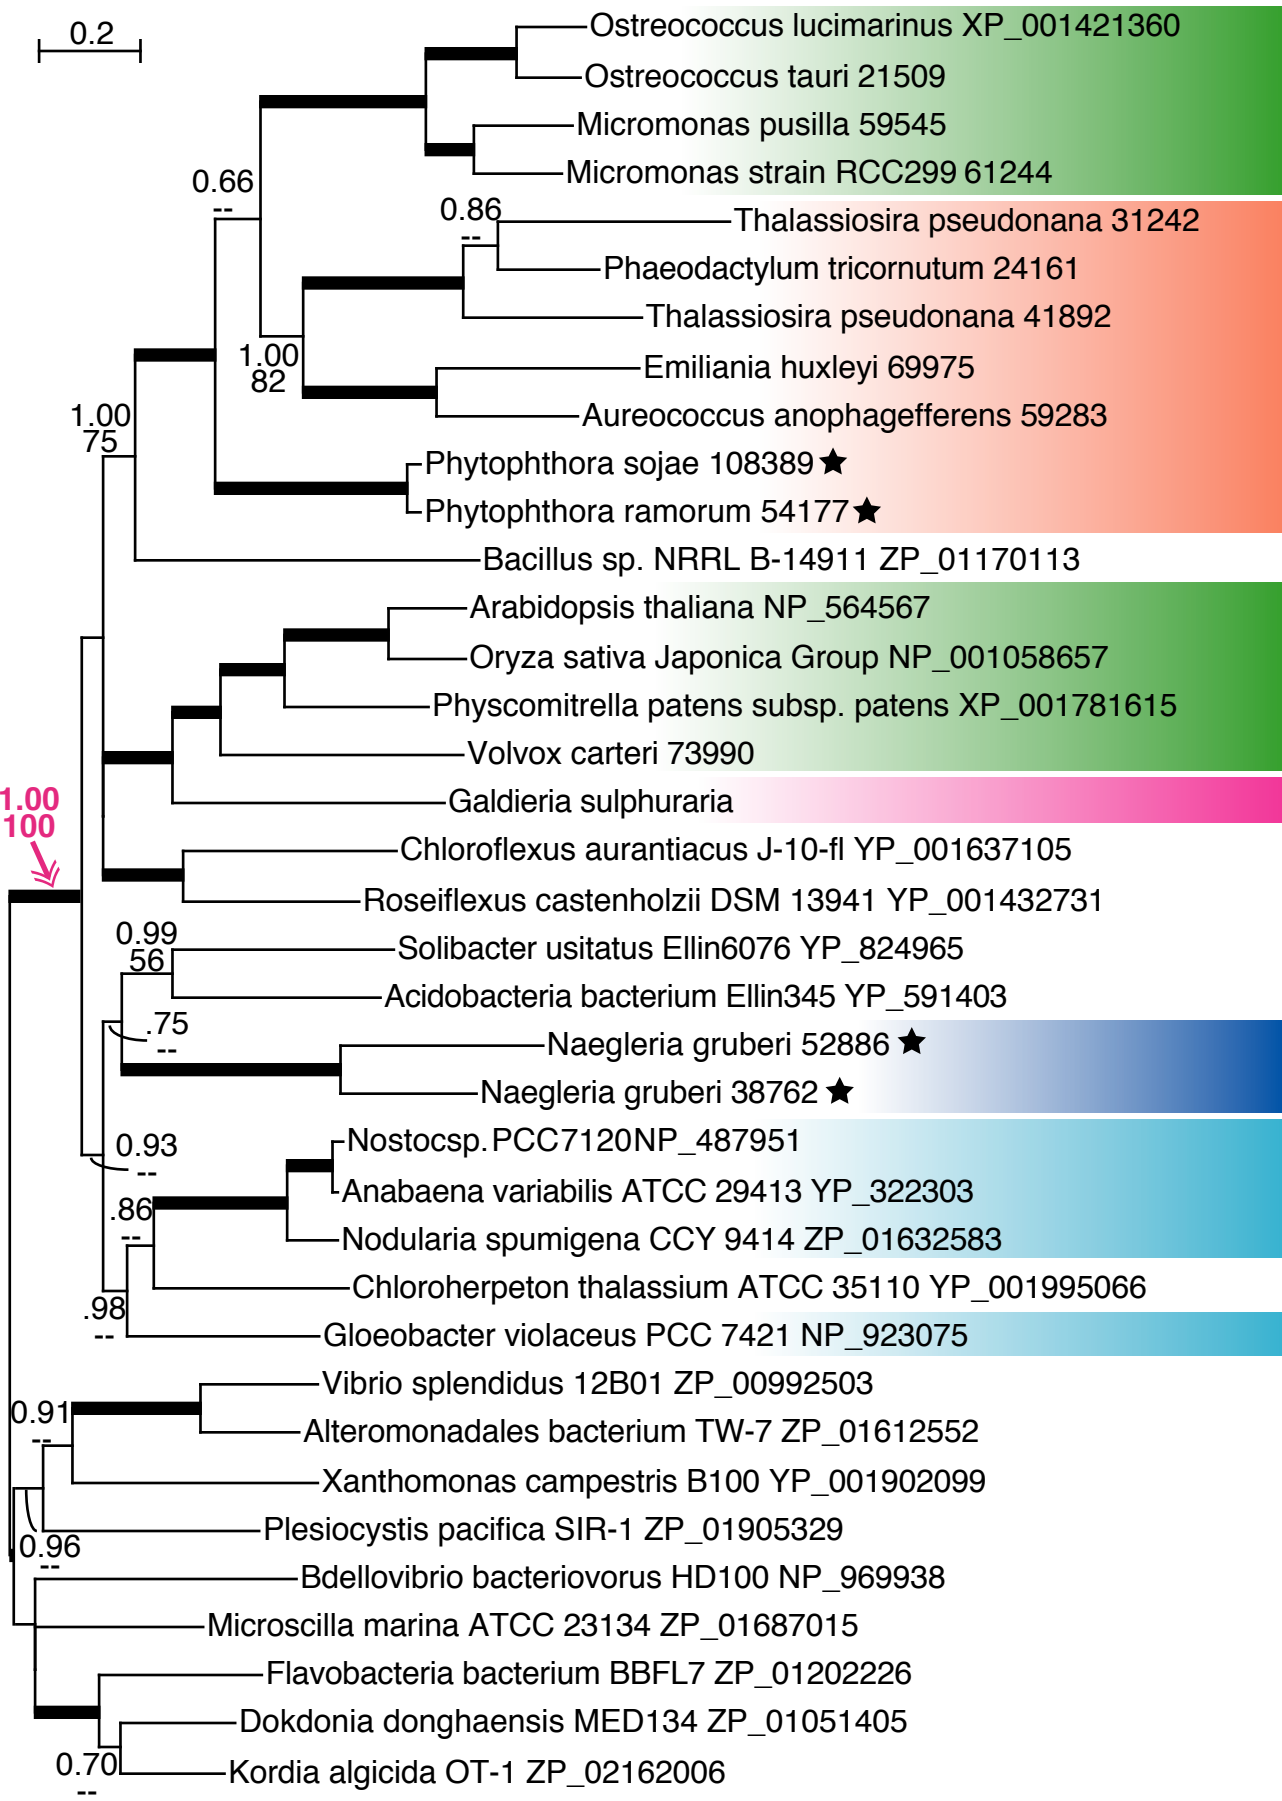

Add\_file 5: Fig. 11 Oligopeptidase
