# Supplementary material for: Cyanobacterial contribution to the genomes of the plastid-lacking protists
Source: PubMed Central journal article supplement (PMC3087521; doi:10.1186/1471-2148-9-197), 2009-08-11
Supplement: 1471-2148-9-197-S6.pdf [file 1471-2148-9-197-S6.pdf]

A Bayesian tree

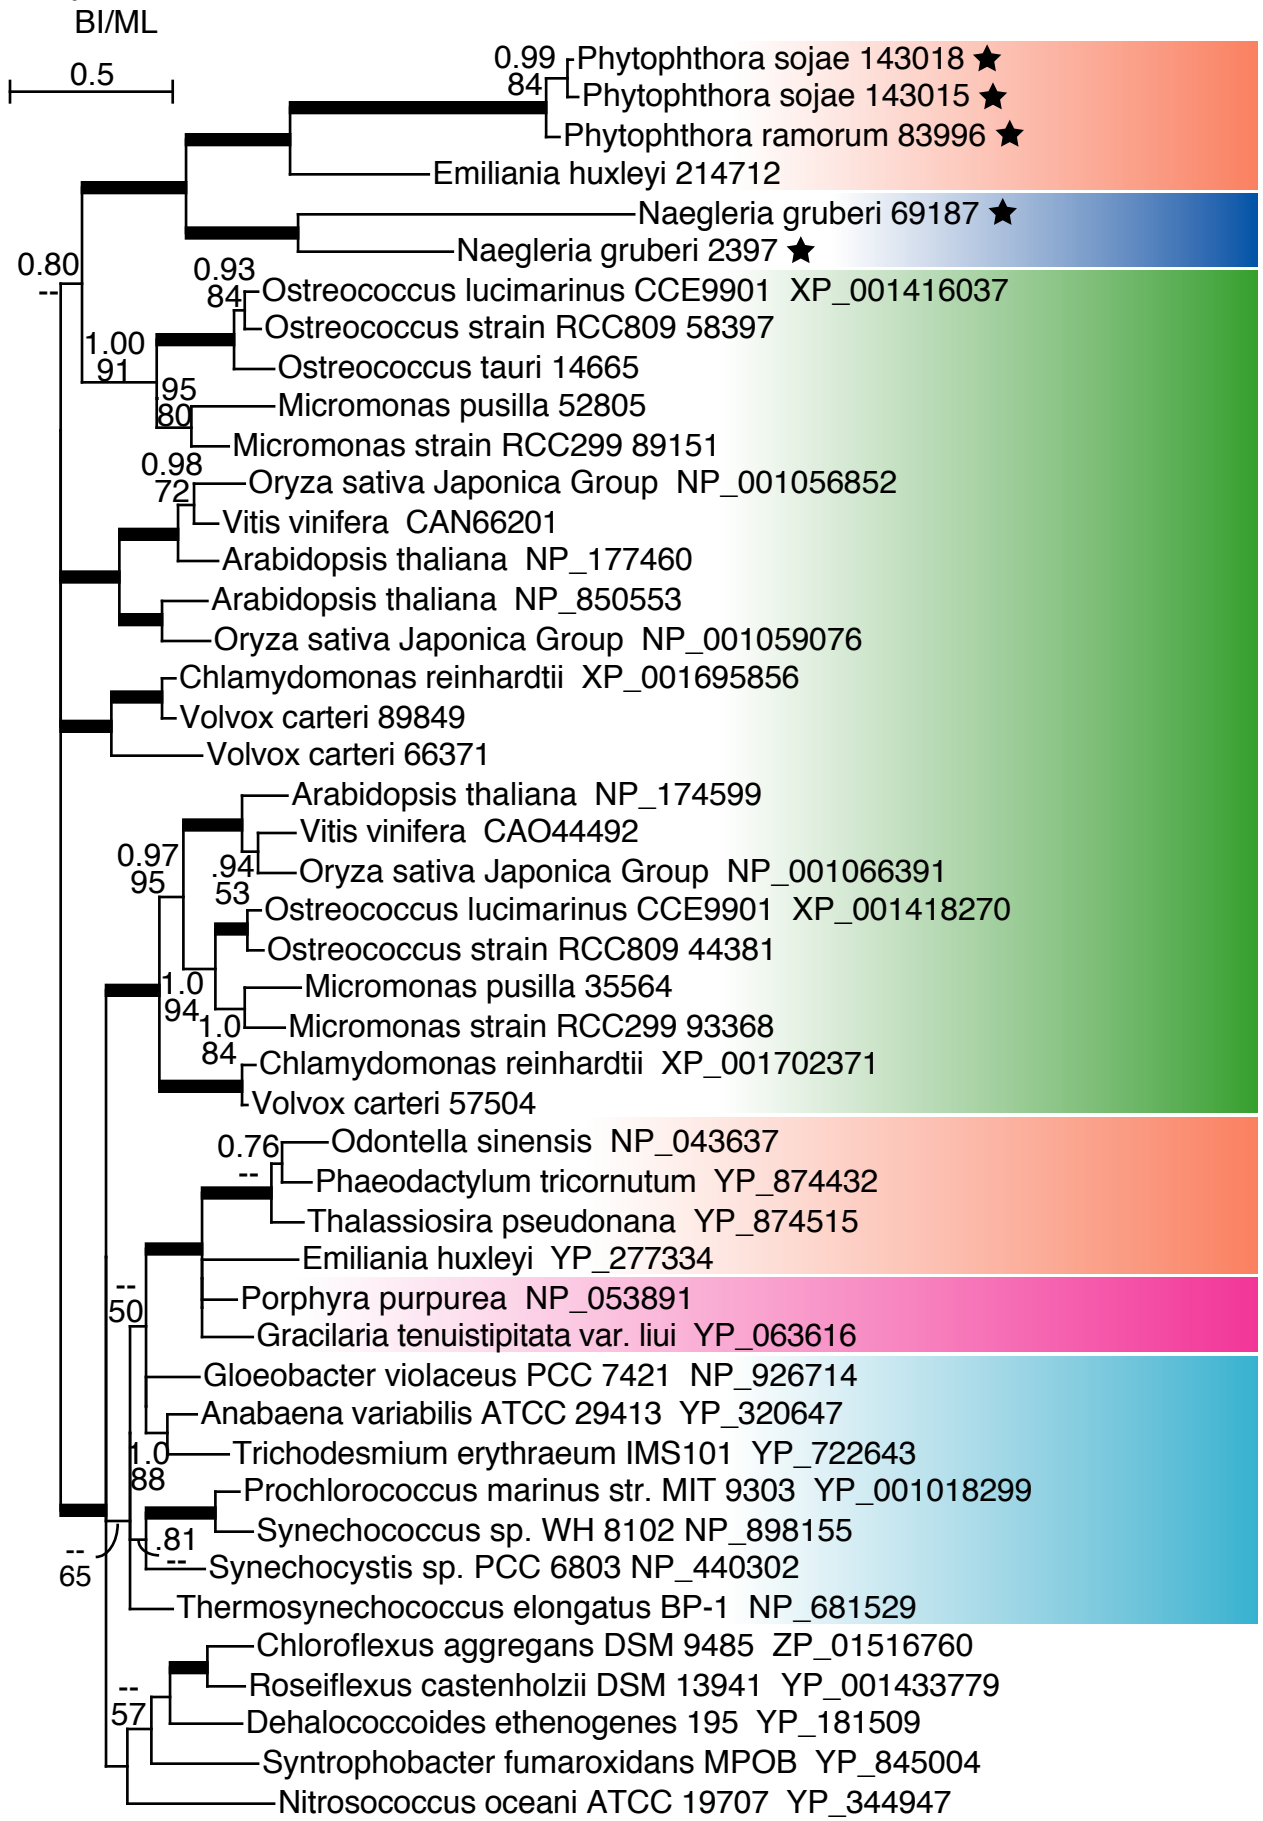

Add\_file 6: Fig. 12 YCF45
