# Supplementary material for: Cyanobacterial contribution to the genomes of the plastid-lacking protists
Source: PubMed Central journal article supplement (PMC3087521; doi:10.1186/1471-2148-9-197), 2009-08-11
Supplement: 1471-2148-9-197-S8.pdf [file 1471-2148-9-197-S8.pdf]

A Bayesian tree

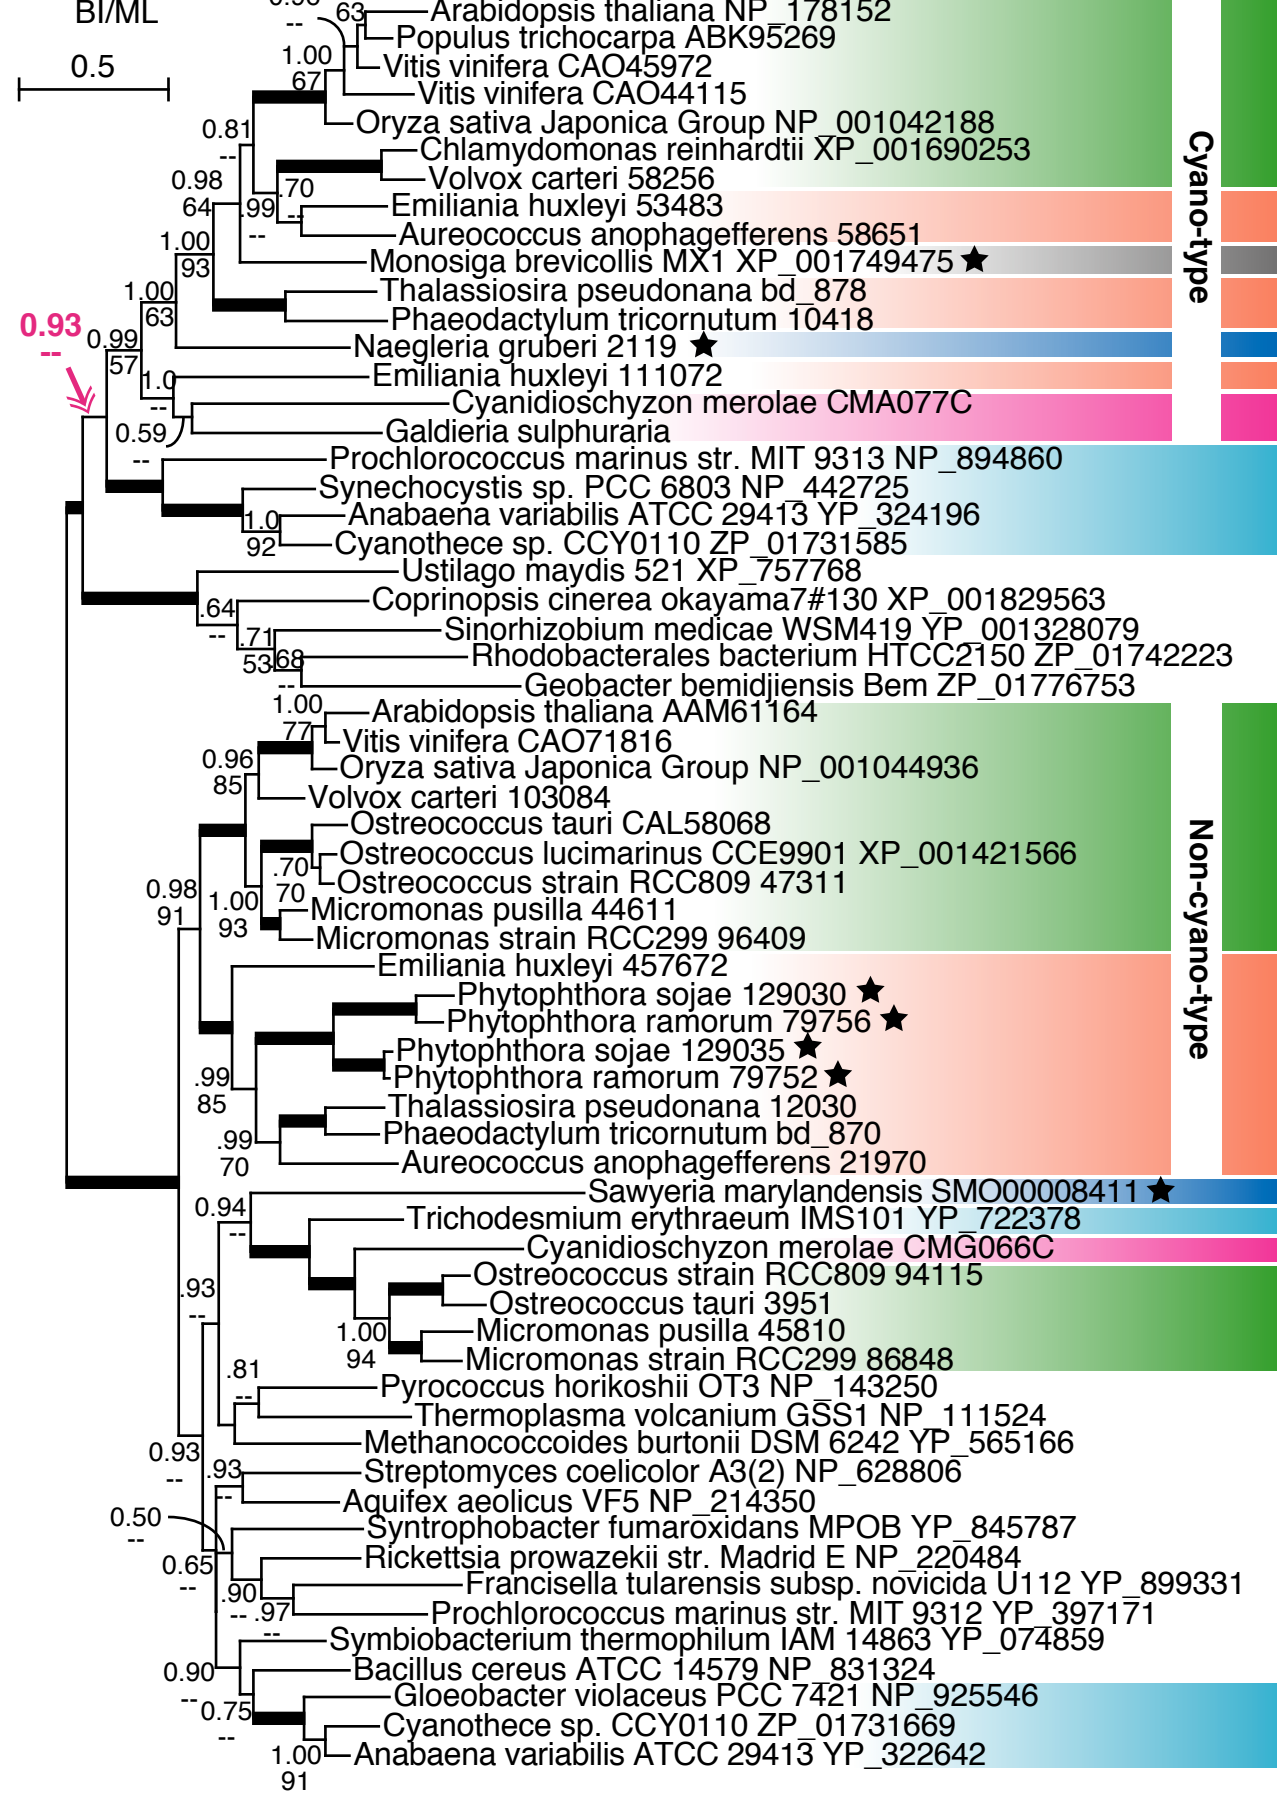

Add\_file 8: Fig. 14 Amino acid aminotransferase
